# Supplementary material for: Encapsulation of Anti-Tuberculosis Drugs within Mesoporous Silica and Intracellular Antibacterial Activities
Source: MDPI journal article supplement (doi:10.3390/nano4030813), 2014-09-11

## Supporting Information

**Figure S1.** Particle size distribution of calcined AMS-6 particles in PBS (Obtained from dynamic light scattering).

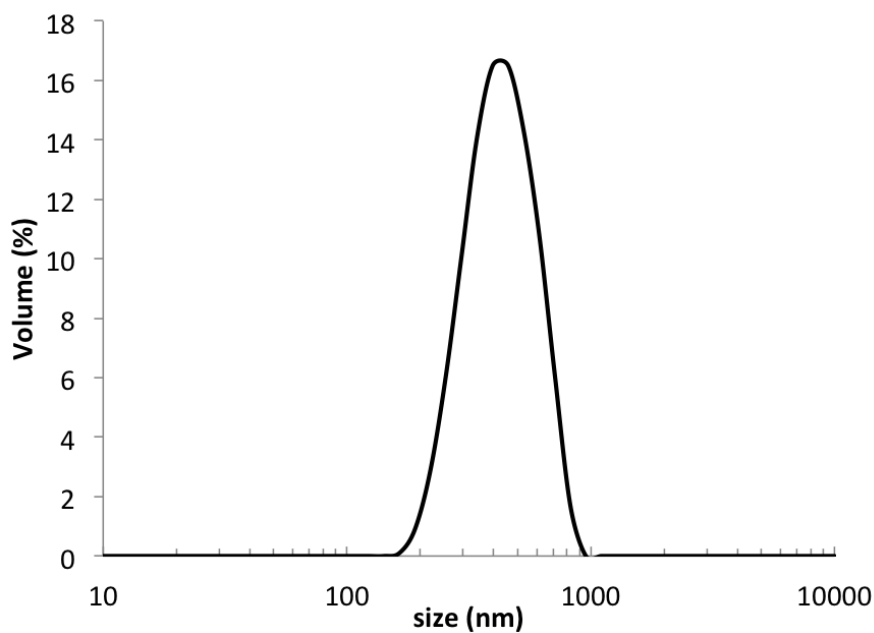

**Figure S2.** TGA curves of (a) PA-824; (b) AMS-6-PA824; (c) moxifloxacin; and (d) AMS-6-Moxi.

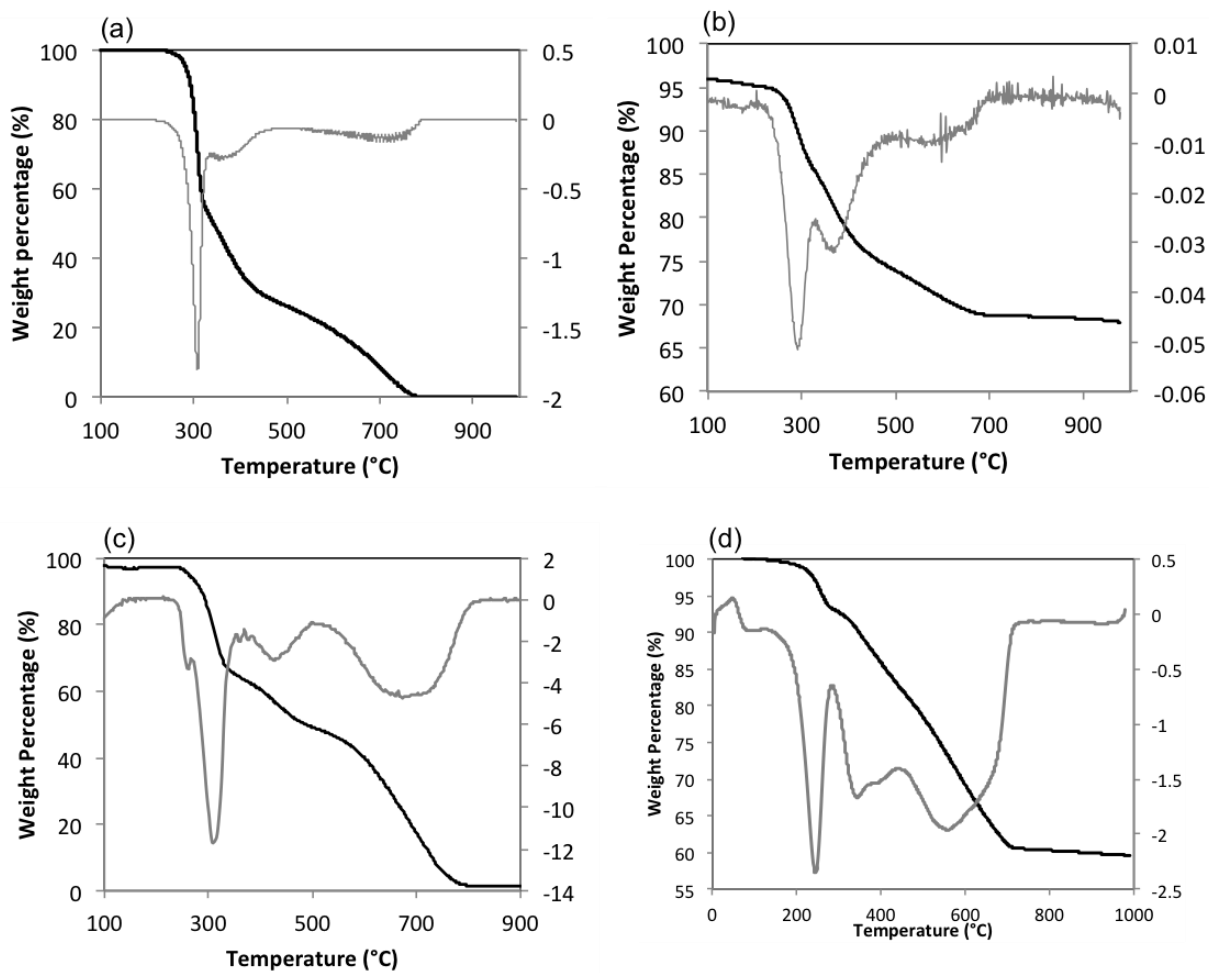

**Figure S3.** DSC curves of free and loaded moxifloxacin.

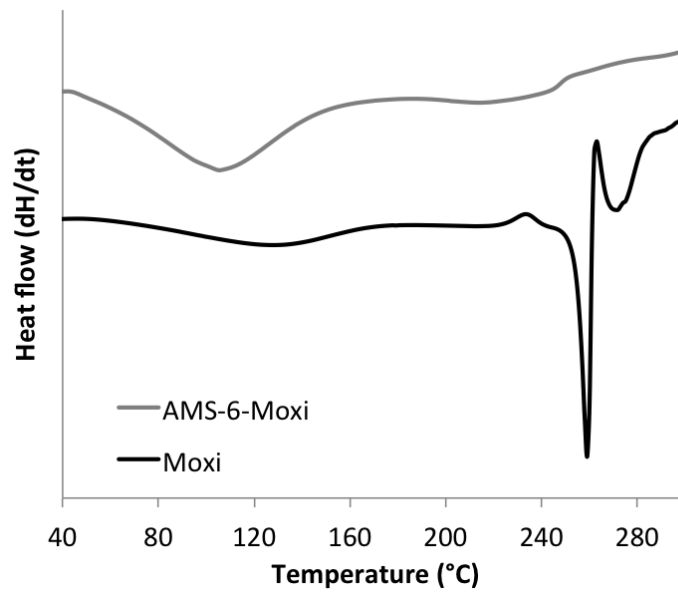

**Figure S4.** (a) Antibacterial activity percentage of calcined AMS-6 particles; (b) total macrophage number after present to calcined AMS-6 particles. (Concentrations are in logarithm scale).

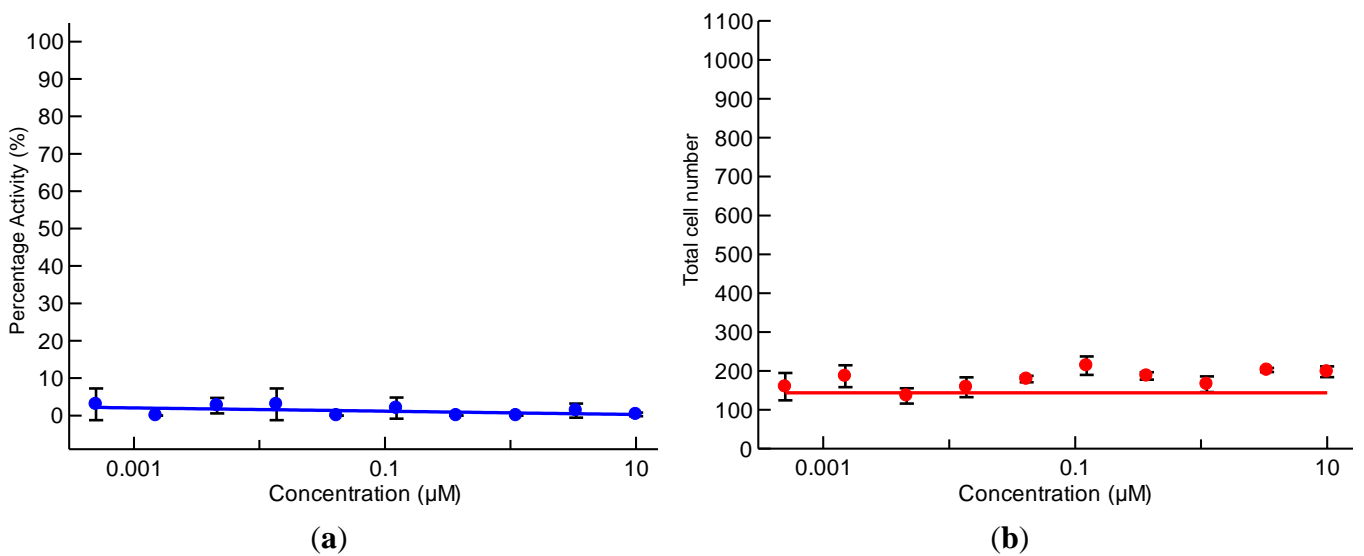

Supplement: s1 [file s1]
